# Supplementary material for: Nonlinear Force-Length Relationship in the ADP-Induced Contraction of Skeletal Myofibrils
Source: PubMed Central journal article supplement — Biophys J. 2007 Sep 21;93(12):4330–41. doi: 10.1529/biophysj.107.110650 (PMC2098727; doi:10.1529/biophysj.107.110650), 2007-09-21

## FIGURE LEGENDS

**FIGURE S1 Example of large oscillations of force and SL at a short SL observed under a low level of activation.** A myofibril was activated with 6 mM MgADP and 1 mM MgATP in the absence of  $\text{Ca}^{2+}$ . The traces of force (top) and change in individual SLs (bottom; sarcomere numbers, S1-S9, correspond to those in the top micrograph) are shown. During oscillation the average SL of each sarcomere was  $\sim 2.35 \mu\text{m}$ . The horizontal scale bar, 10  $\mu\text{m}$ . The vertical scale bar in the bottom trace, 0.5  $\mu\text{m}$ .

**FIGURE S2 Resting force-SL relationship.** The resting force measured without activation (filled circles), and after 1-5 times activations either by 6 mM MgADP (open squares) or by 14 mM MgADP (crosses) are shown.

**FIGURE S3 Force-SL relationship with the standard deviation of SL.** The plots with mean  $\pm$  SD for SL are shown in A and B, which correspond to those in Figs. 4 and 7, respectively. The SD in each plot (horizontal bars) was calculated from the individual SLs throughout the myofibril as shown in Fig. 2 B.

**FIGURE S4 Effect of dextran obtained from the model analysis.** To demonstrate the effect of dextran, the sarcomeric volume was reduced by 8 to 12% in the presence of 6 mM MgADP (lower and upper solid lines, respectively), which corresponds to 4 to 6% changes in the lattice spacing by the addition of 1% dextran (Fig. 6 B). The dashed line shows the relationship without dextran. For comparison with the experimental data, see Fig. 7.

**FIGURE S5 Force-SL relationship obtained from the Eq. A7 in Appendix.** The force-SL relationships at various [MgADP] are shown. [MgADP] is shown above each trace. (*Inset*) The active force depending on [MgADP] at two different SLs, 2.5  $\mu\text{m}$  (solid line) and 2.9  $\mu\text{m}$  (dashed line). For comparison with the experimental data, see Fig. 4.

**Movie S1** Spontaneous oscillation in a myofibril at short SL, corresponding to Fig. S1.

**Movie S2** Force development in a myofibril at a middle SL, corresponding to Fig. 3 A.

**Movie S3** Force development in a myofibril at a long SL, corresponding to Fig. 3 B.

Figure S1

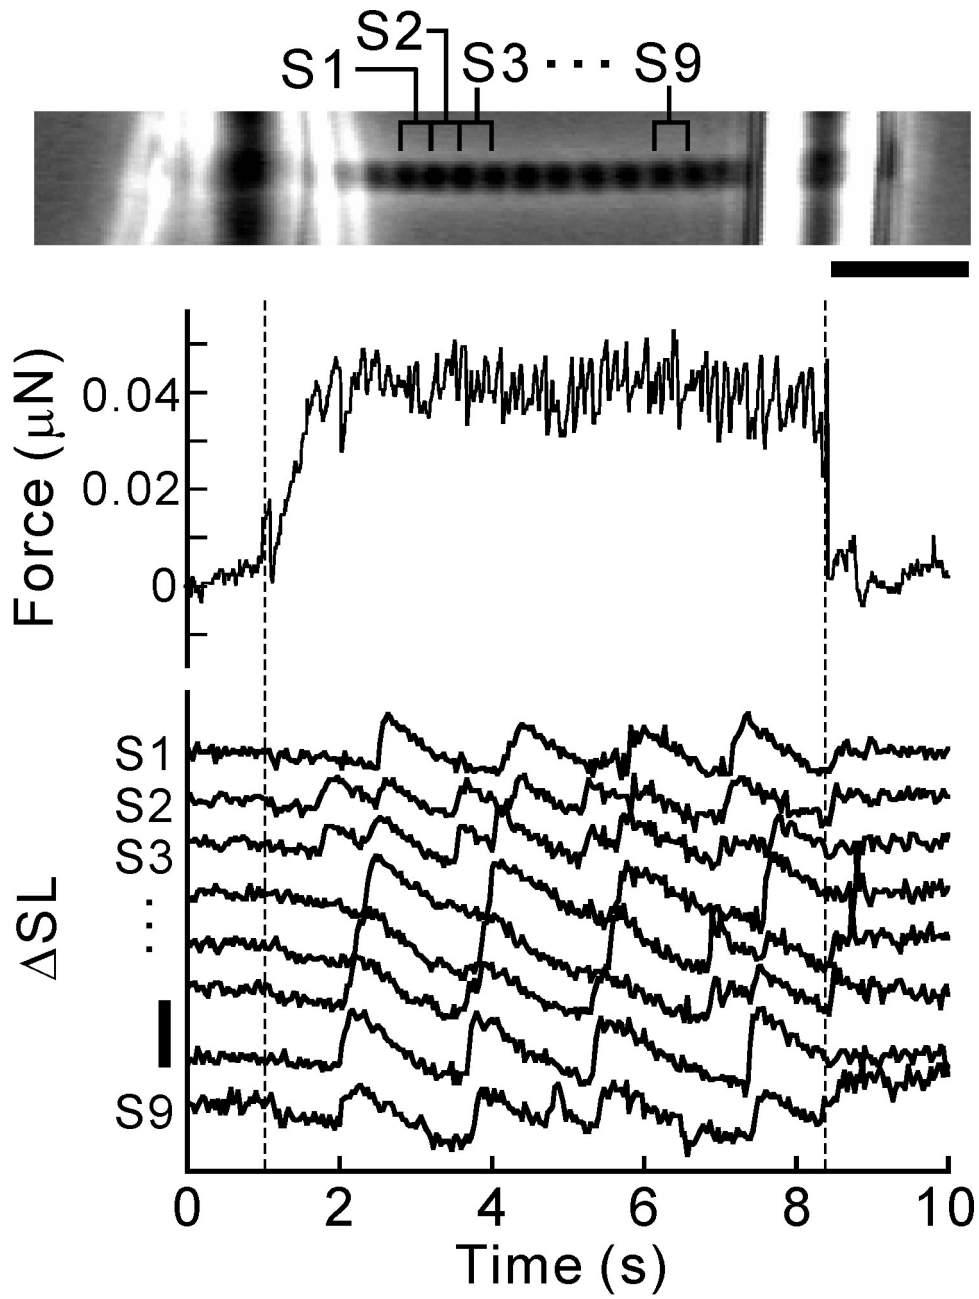

Figure S2

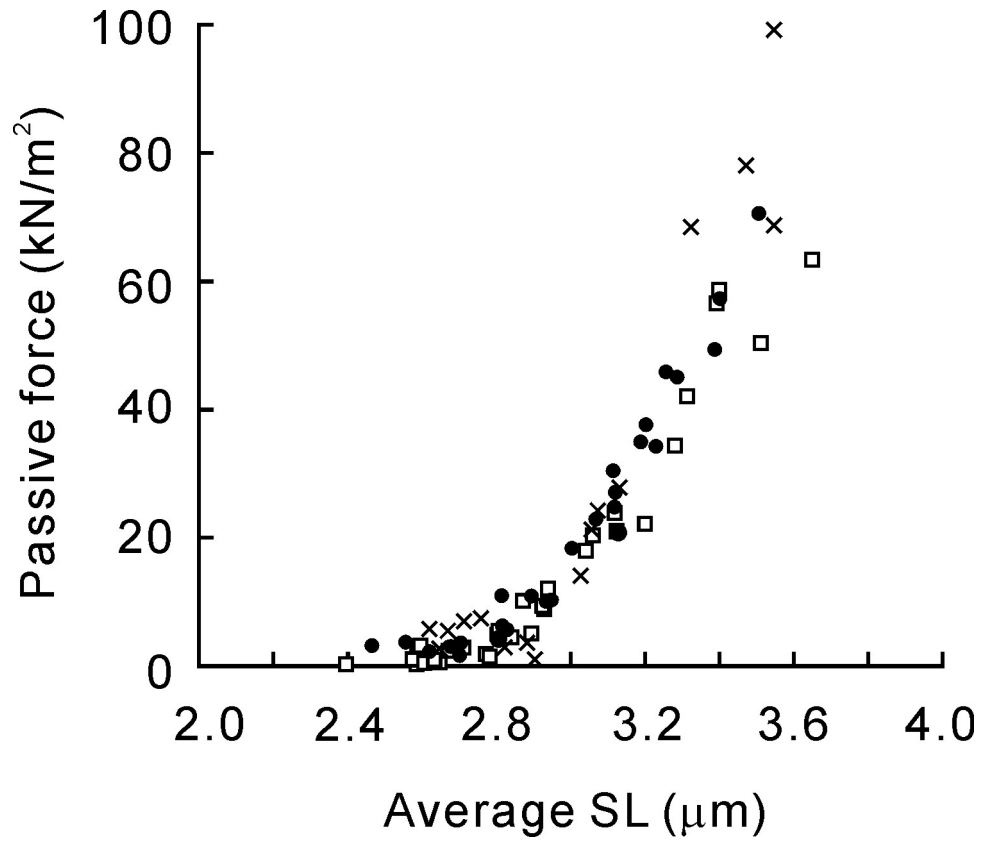

Figure S3

A

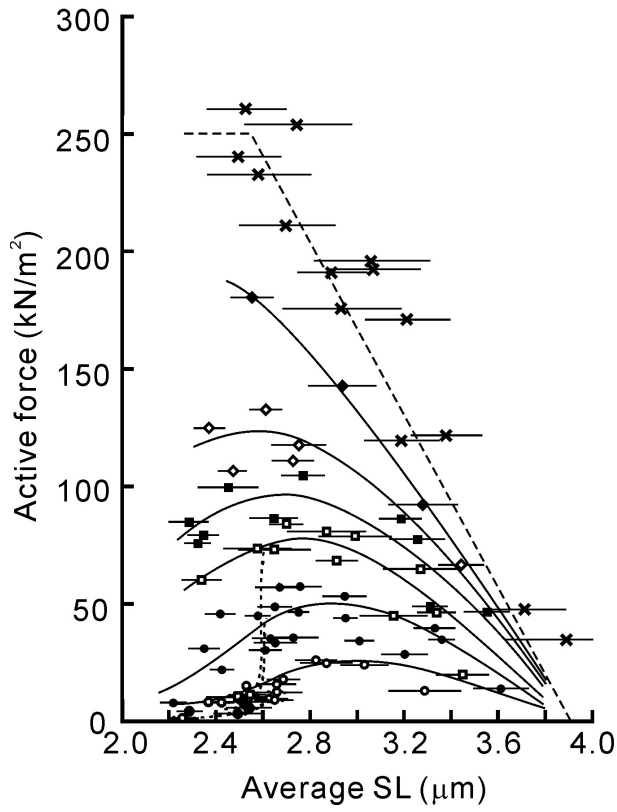

B

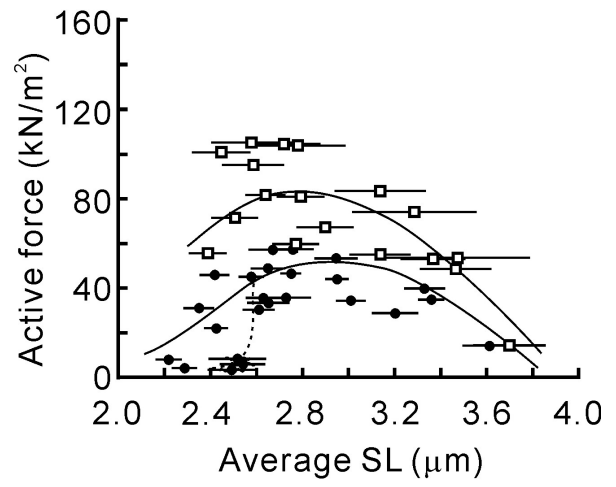

Figure S4

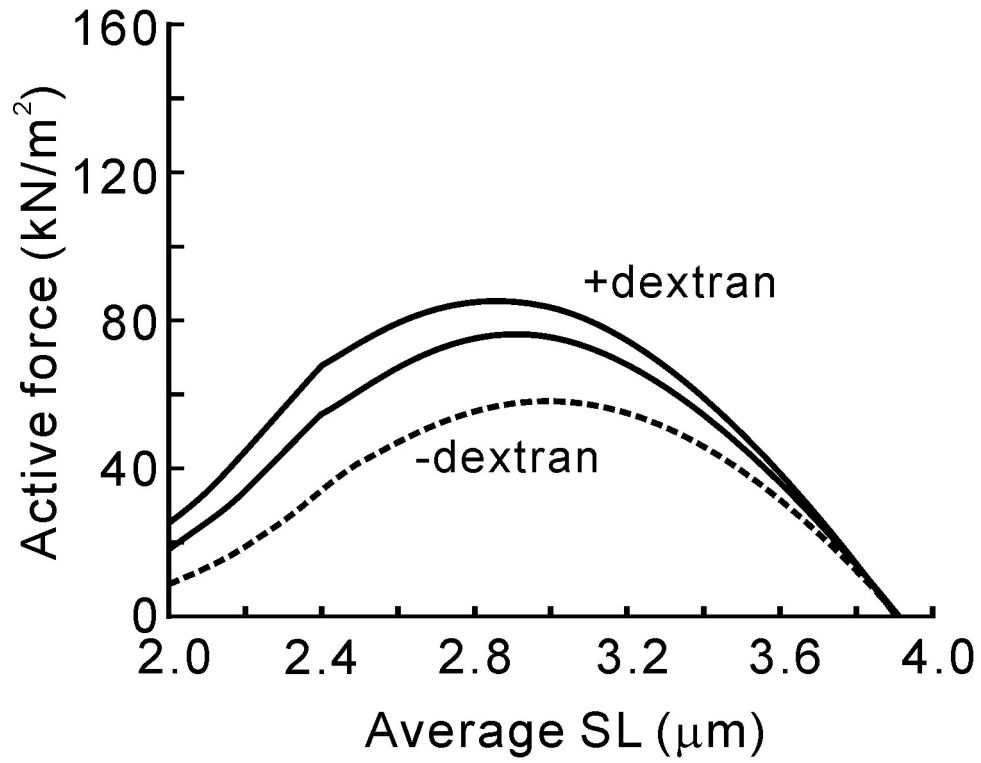

Figure S5

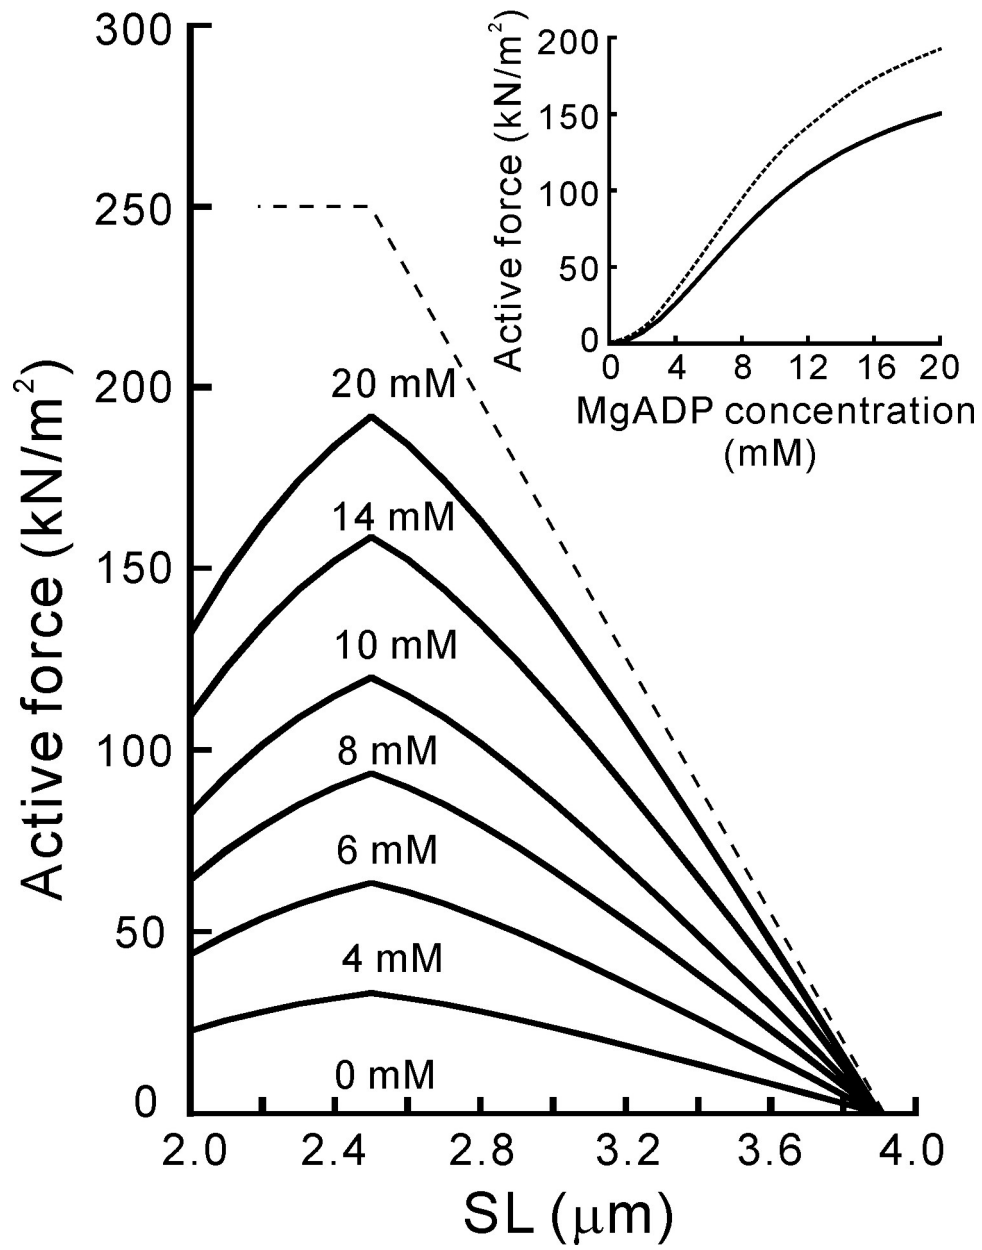

Supplement: biophysj_107.110650_1.pdf [file biophysj_107.110650_1.pdf]
